# Supplementary material for: A fluorescent perilipin 2 knock-in mouse model reveals a high abundance of lipid droplets in the developing and adult brain
Source: PubMed Central journal article supplement (PMC11213871; doi:10.1038/s41467-024-49449-w), 2024-06-28
Supplement: 41467_2024_49449_MOESM3_ESM.pdf [file 41467_2024_49449_MOESM3_ESM.pdf]

## **Description of Additional Supplementary Files:**

**Supplementary Data 1:** Proteomics data comparison tdTom-Plin2 wt and tdTom-Plin2 het NSPCs

**Supplementary Data 2:** Differentially expressed genes in microglia cluster 2 vs cluster 1
